# Supplementary material
Source: PubMed Central journal article supplement (PMC4260612)
Supplement: pnas.201414399SI.pdf [file pnas.201414399SI.pdf]

# Supporting Information

Mitchell and Boeke 10.1073/pnas.1414399111

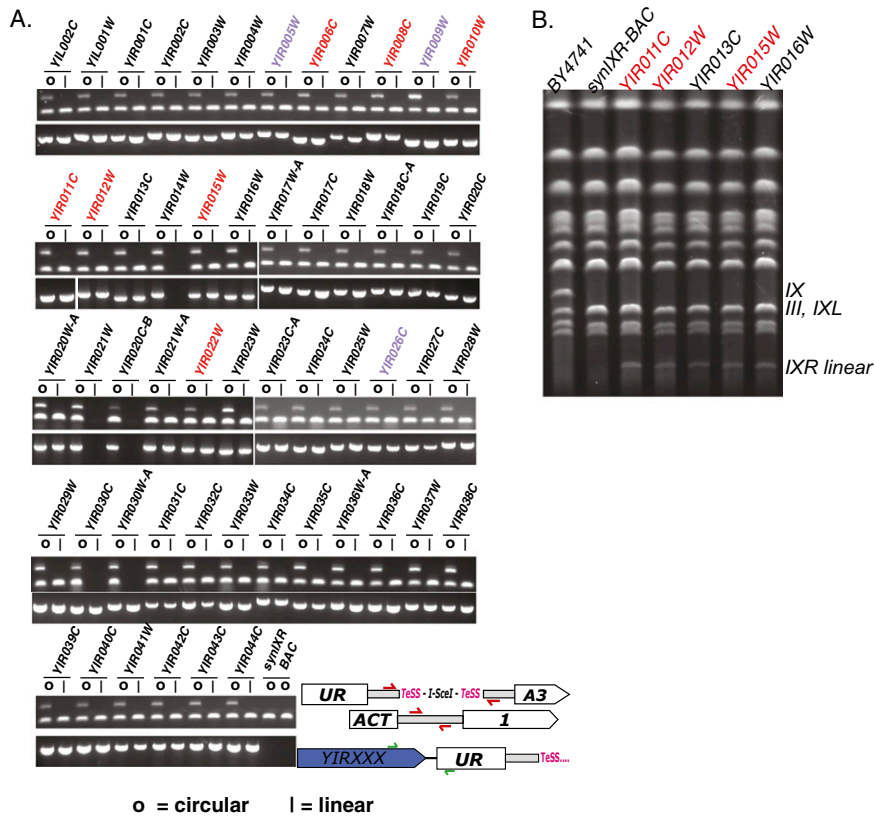

**Fig. S1.** PCR analysis of panel of *synIXR* BAC permutable strains. (A) PCR confirmation of integration and circular/linear status. All permutations were tested, pre- and postlinearization (circular and linear, respectively), by PCR using two primer sets. First, integration was confirmed using a gene-specific primer in combination with a primer that annealed within the telomerator (green arrows; lower gel). These primers confirmed the presence of the telomerator cassette at each position whether in the linear or circular conformation of *synIXR* in all strains. Second, a primer pair designed to anneal to the *ACT1* intron (red arrows) was used. This primer pair amplified a product from the endogenous *ACT1* intron at its native locus on chromosome six (upper gel, lower band), as well as from an intact telomerator cassette (upper gel, upper band). Following growth in galactose, absence of the latter band is consistent with linearization. (B) Pulsed field gel showing separation of full-length chromosomes isolated from five *synIXR* linear derivative strains (3' of *YIR011C*, *YIR012W*, *YIR013C*, *YIR015W*, and *YIR016W*). Compared to a wild-type strain encoding a native chromosome IX (BY4741) or the parental strain encoding a circular *synIXR* (*synIXR* BAC), only the linear derivatives display a fast migrating band, consistent with linearization.
